# Supplementary material
Source: Springer Nature journal article supplement (https://www.springermedizin.de/resource/supplementary/13075_2009_2777_MOESM6_ESM.pdf/9692860)

## SEM images

### A

#### Pellets

Phase I: 5%O<sub>2</sub>

Phase II: 5%O<sub>2</sub>

Phase II: 19%O<sub>2</sub>

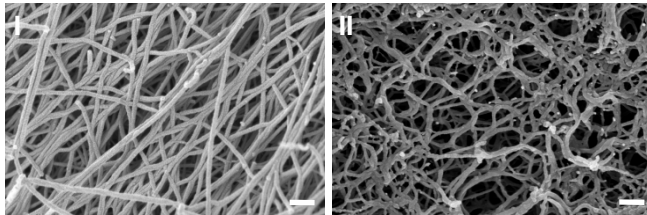

### B

#### Native tissues

Healthy

Osteoarthritic

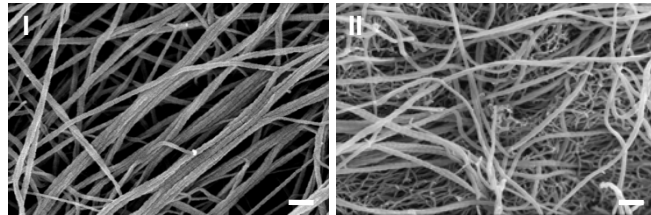

## Collagen structure

### C

#### Persistence length

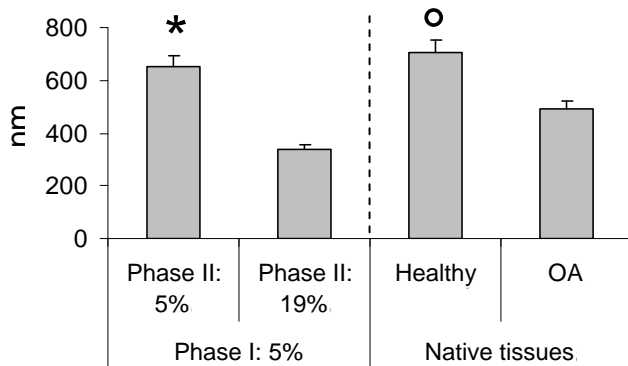

### D

#### Bending ratio

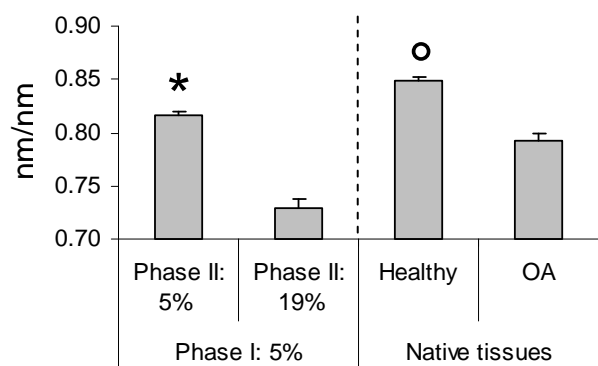

Supplement: MOESM6 [file 9692860]
